# Supplementary material for: Graphene oxide-based composite organohydrogels with high strength and low temperature resistance for strain sensors
Source: Royal Society of Chemistry journal article supplement (doi:10.1039/d1sm01655e), 2021-12-23
Supplement: d1sm01655e1.pdf [file d1sm01655e1.pdf]

## **Graphene Oxide-Based Composite Organohydrogels with High Strength and Low Temperature Resistance for Strain Sensors**

Rui Zhao,<sup>1,+</sup> Li Jiang,<sup>1,+</sup> Ping Zhang,<sup>2</sup> Dan Li,<sup>2</sup> Zhenzhong Guo,<sup>3</sup> Liang Hu<sup>1,\*</sup>

1. State Key Laboratory of Radiation Medicine and Protection, Collaborative Innovation Center of Radiological Medicine of Jiangsu Higher Education Institutions, and School for Radiological and Interdisciplinary Sciences (RAD-X), Soochow University, Suzhou 215123, P. R. China.

2. State and Local Joint Engineering Laboratory for Novel Functional Polymeric Materials, College of Chemistry, Chemical Engineering and Materials Science, Soochow University, Suzhou 215123, P. R. China.

3. Hubei Province Key Laboratory of Occupational Hazard Identification and Control, Wuhan University of Science and Technology, Wuhan 430065, P. R. China

Corresponding author: Liang Hu

Email: [huliang@suda.edu.cn](mailto:huliang@suda.edu.cn)

+: These authors contributed equally.

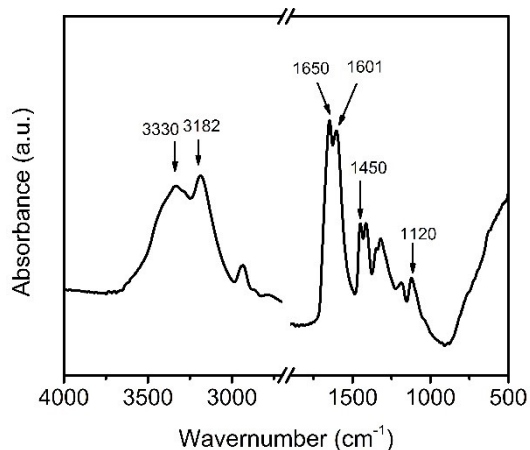

**Figure S1.** The ATR FTIR spectrum of the PAAG hydrogel.

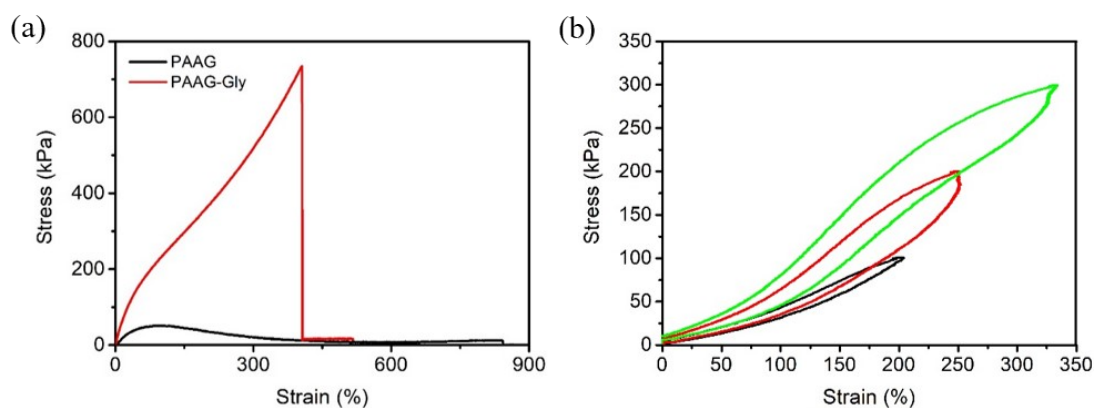

**Figure S2.** (a) Stress-strain curves of the PAAG hydrogel and PAAG-Gly organohydrogel. (b) The stress-strain curves of PAAG-Gly organohydrogel under cyclic tensile loading/unloading at different strains.
